# Supplementary material
Source: publisher figshare collection journal article supplement (https://gsapubs.figshare.com/ndownloader/files/23320202)

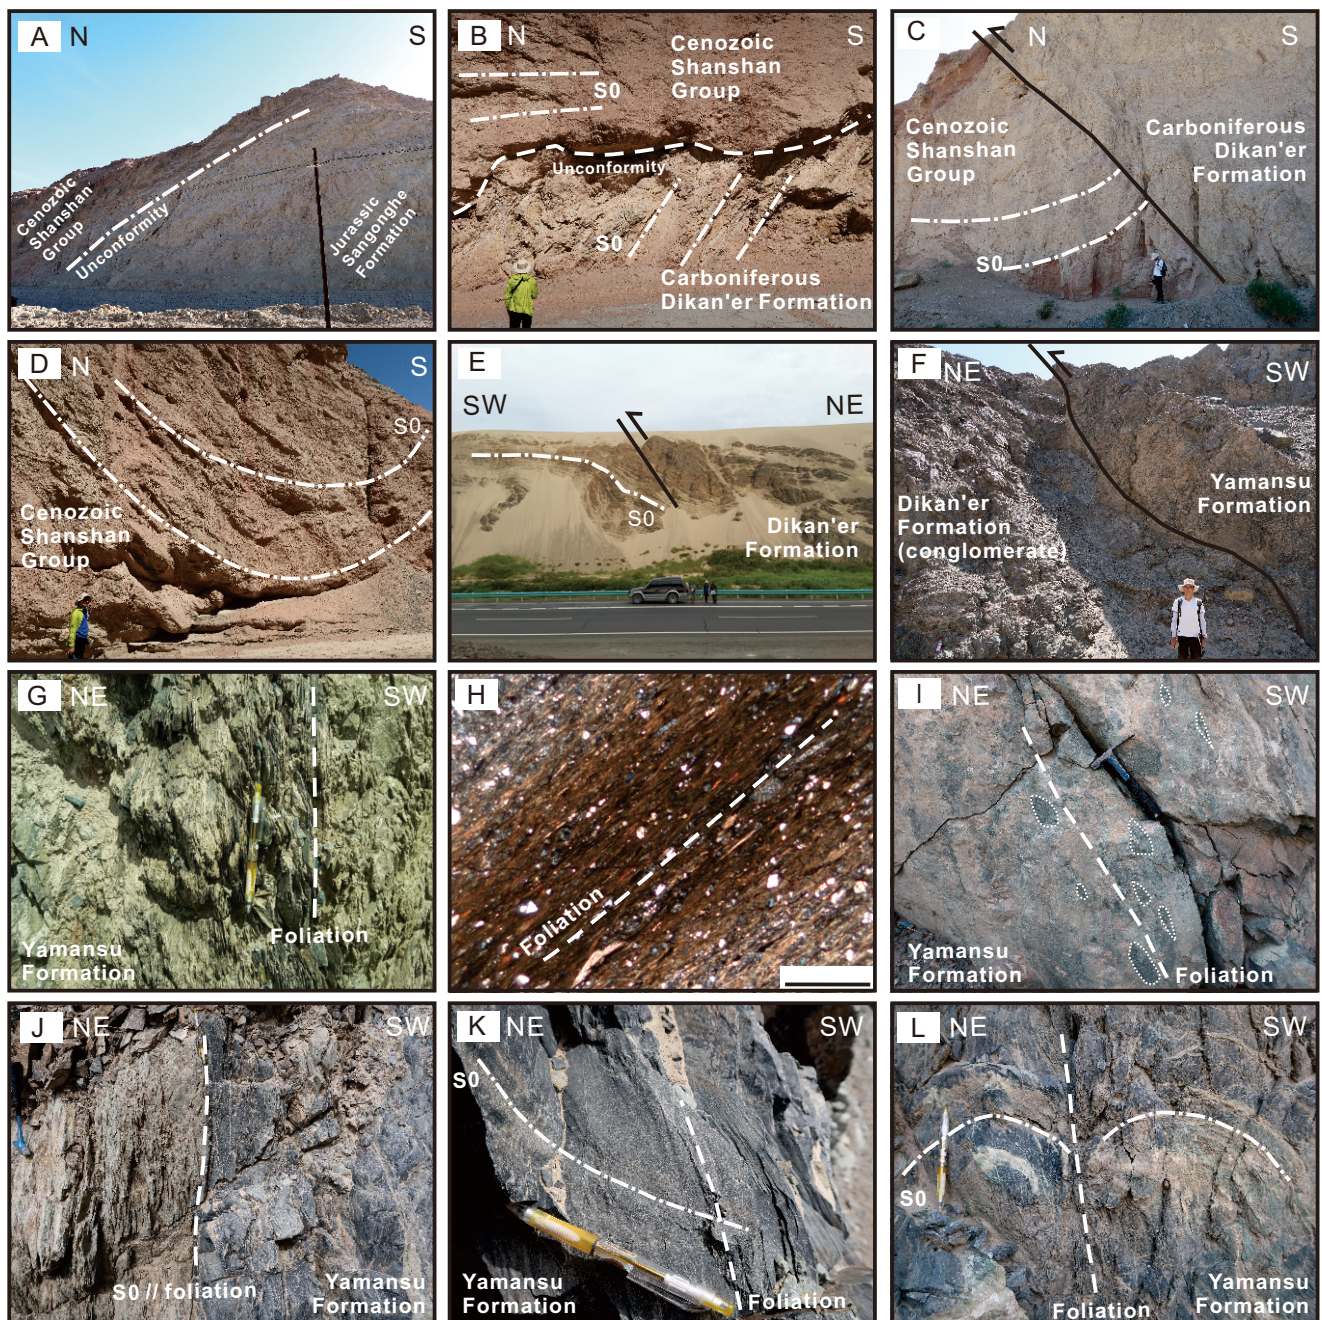

Figure 5



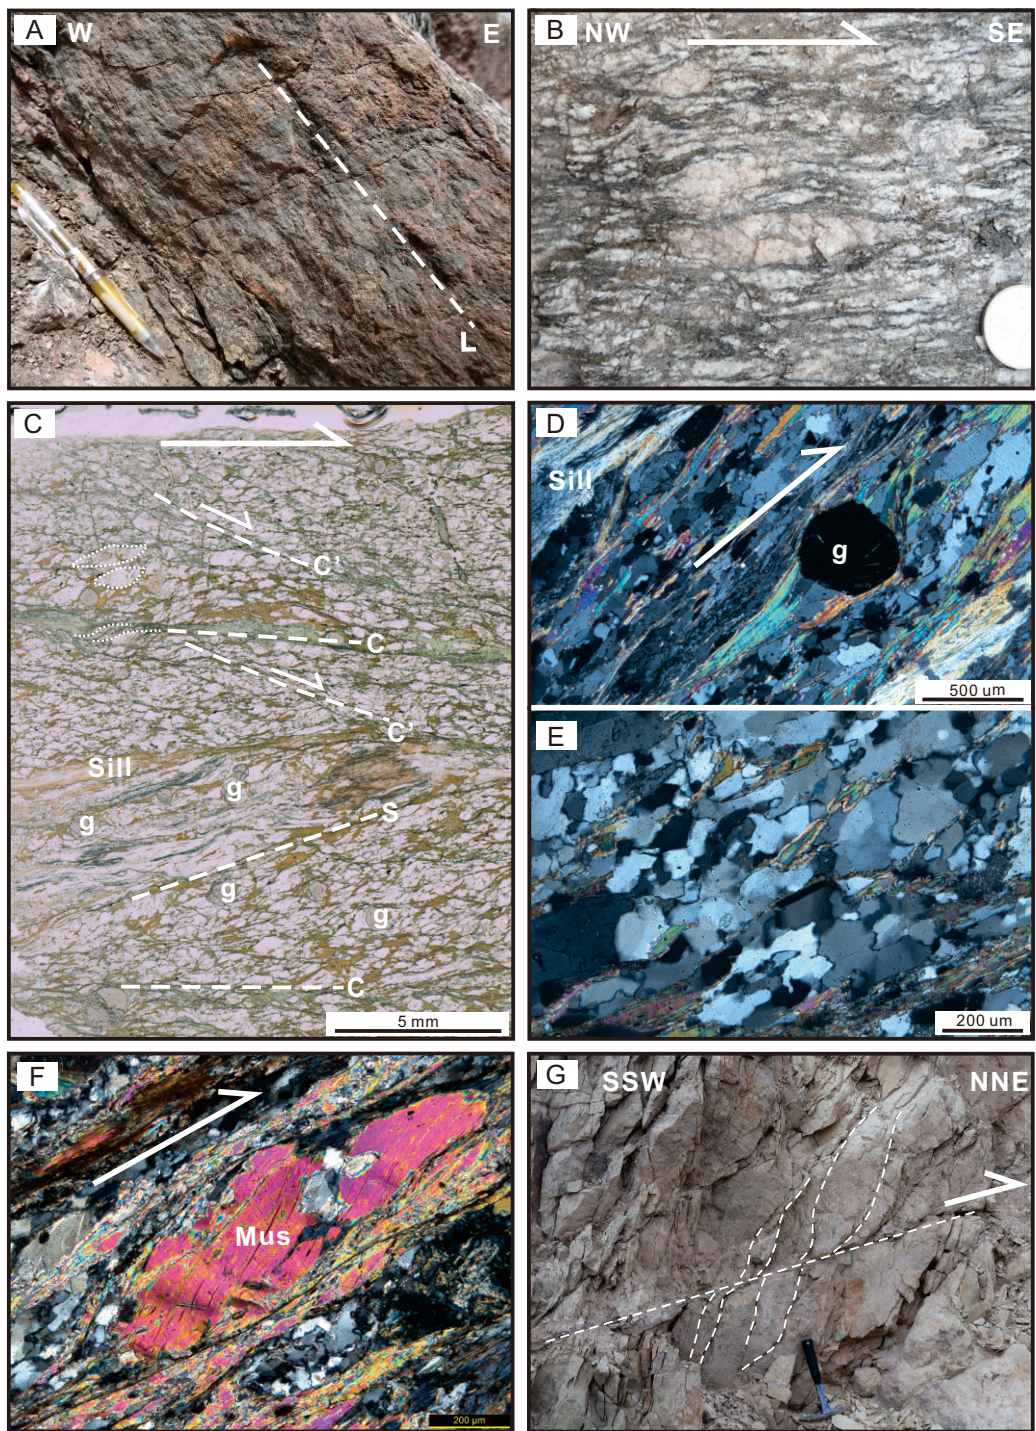

Figure 6



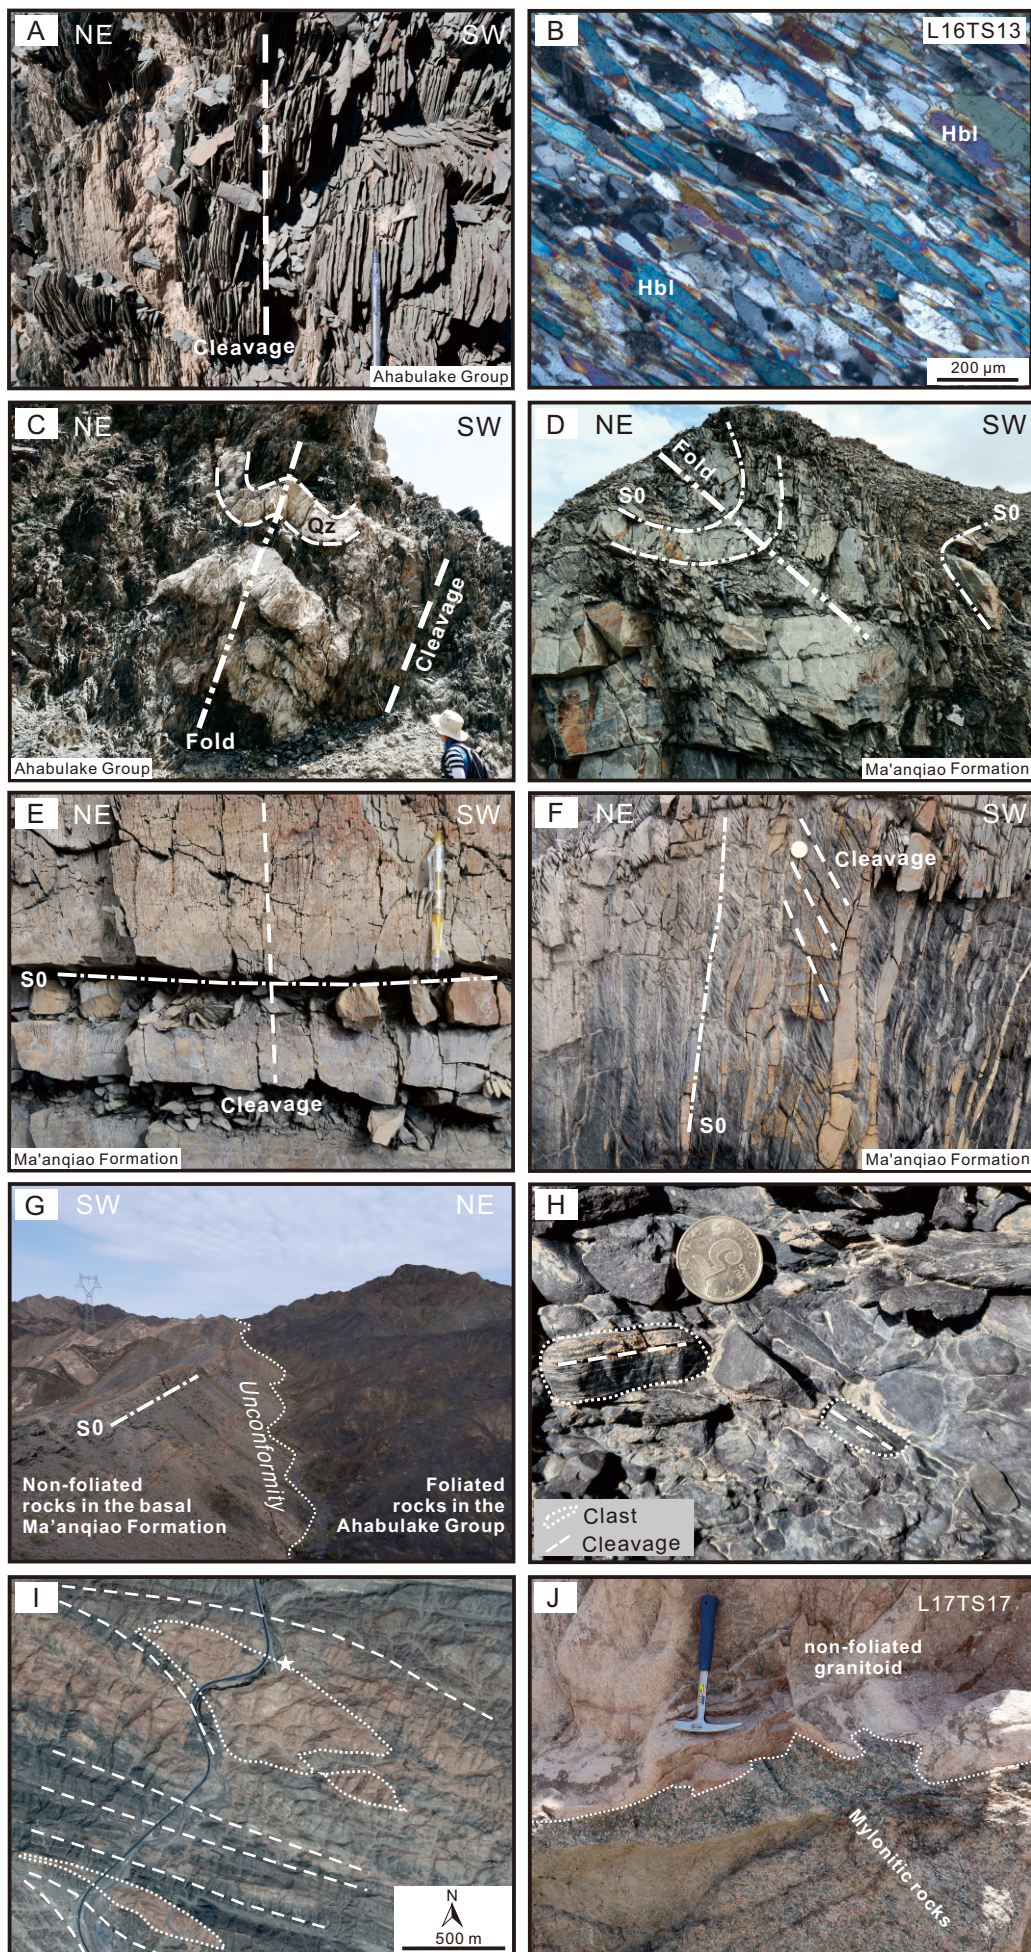

Figure 8



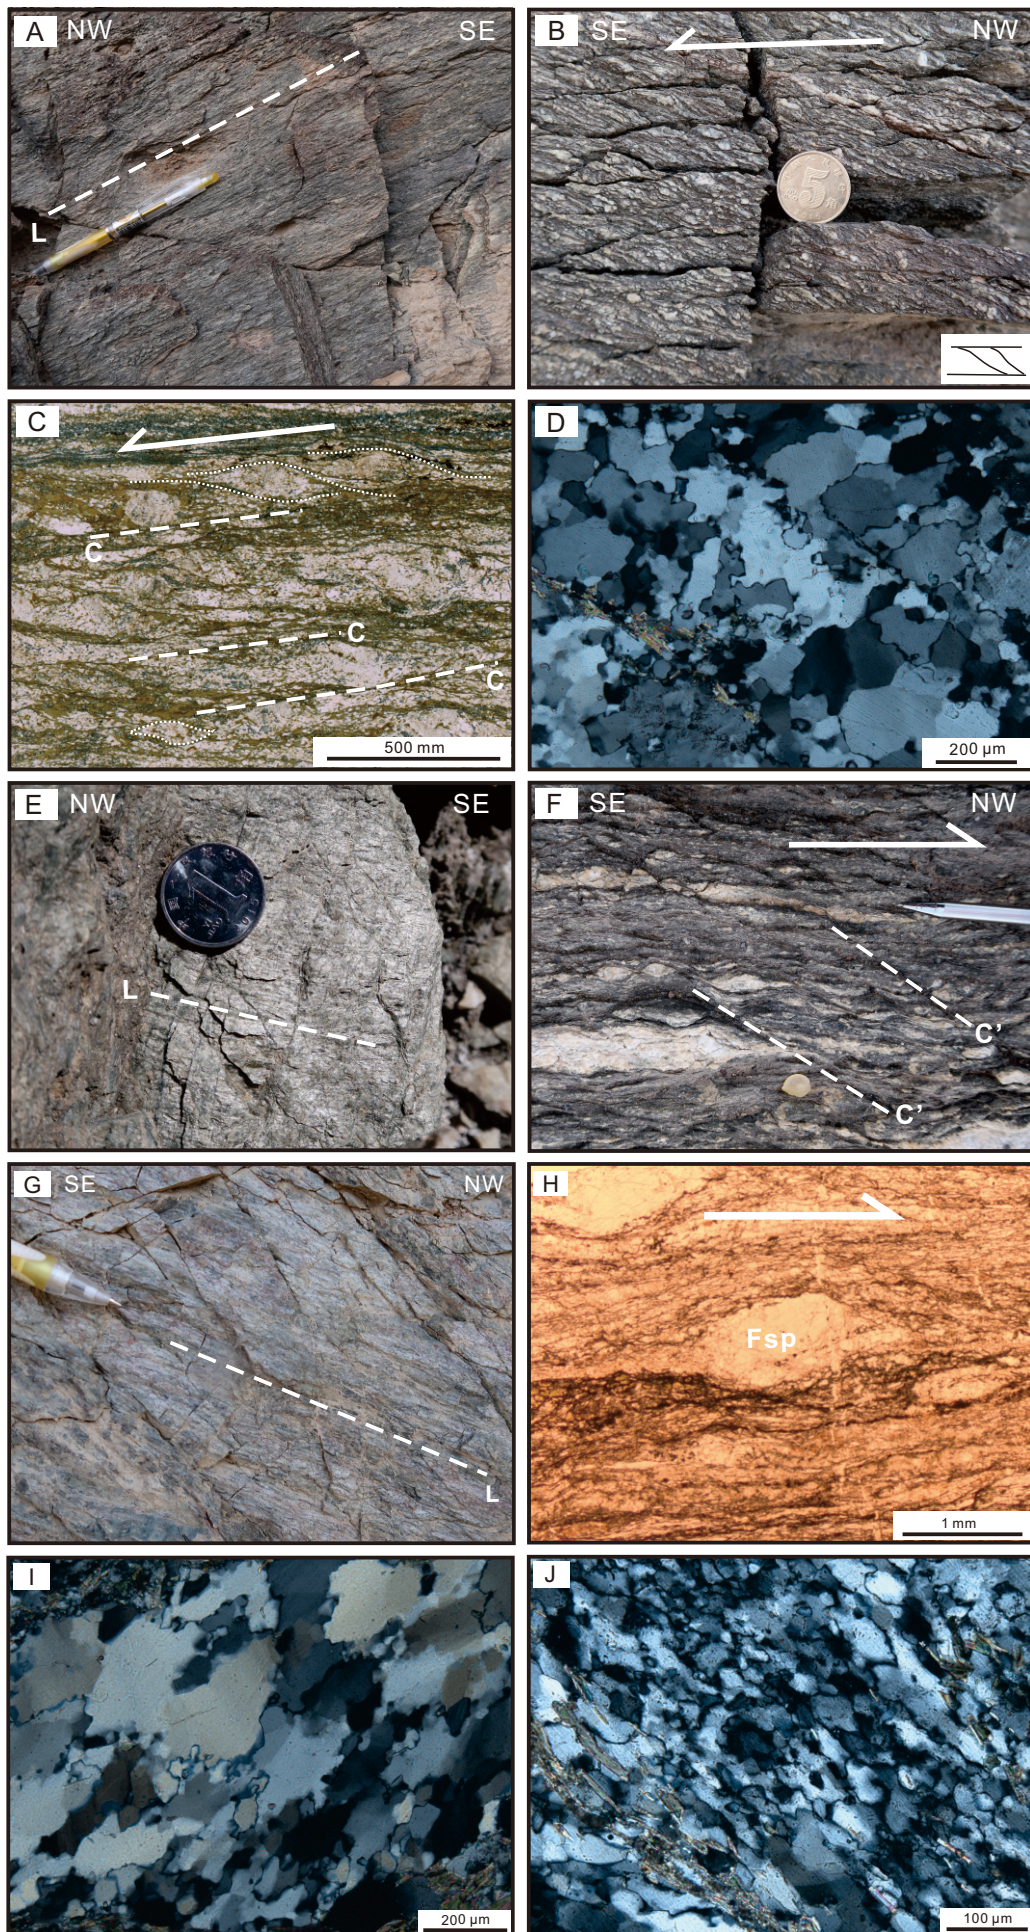

Figure 9



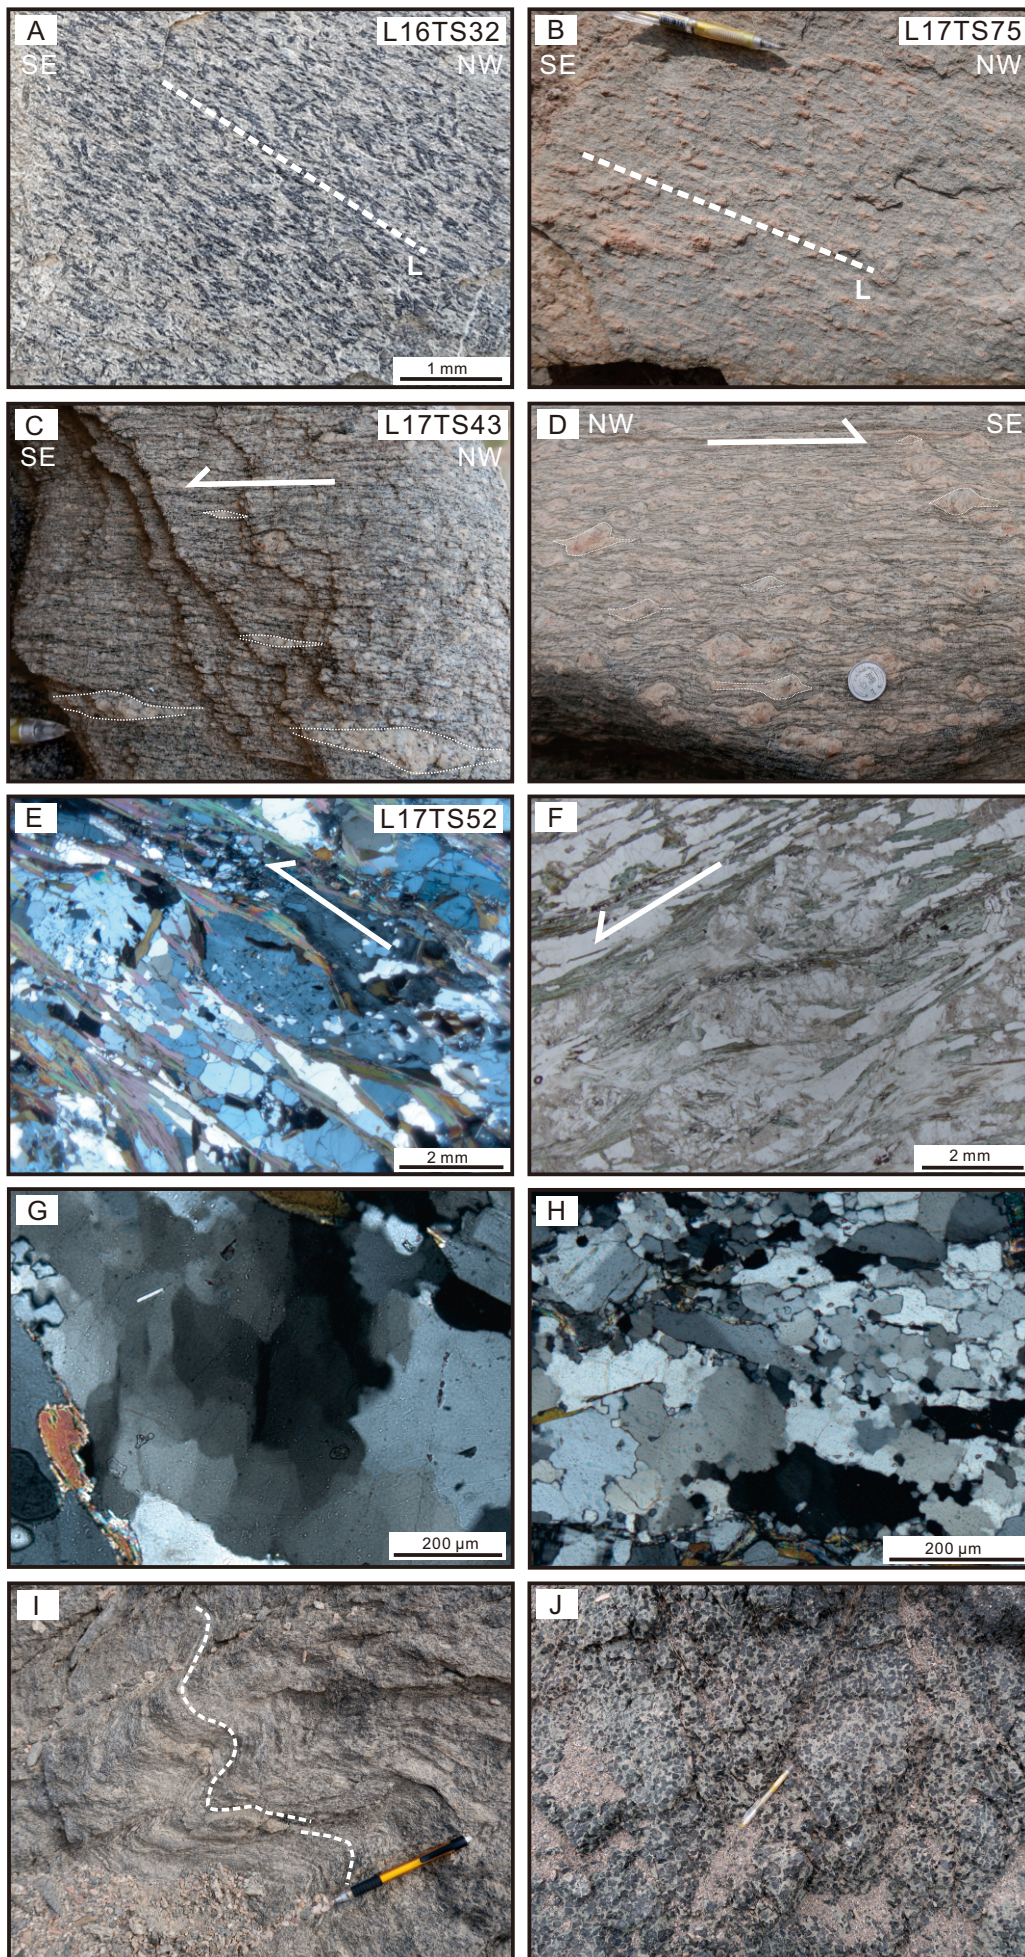

Figure 11

Supplement: Supplementary file 1 [file 23320202]
